1 Title: Growth Condition Dependent Differences in Methylation Implies Transiently  
2 Differentiated DNA Methylation States in *E. coli*

3 Authors: Georgia L Breckell<sup>a#</sup>, Olin K Silander<sup>a#</sup>

4

5 <sup>a</sup> School of Natural and Sciences, Massey University, Auckland, 0745, New Zealand

6

7 # Corresponding Authors: GLB, [georgiabreckell@gmail.com](mailto:georgiabreckell@gmail.com); OKS, [olinsilander@gmail.com](mailto:olinsilander@gmail.com)

8

9 Keywords: Nanopore, DNA methylation, *E. coli*

10

## 11 Abstract

12 DNA methylation in bacteria frequently serves as a simple immune system, allowing  
13 recognition of DNA from foreign sources, such as phages or selfish genetic elements. It is  
14 not well established whether methylation also frequently serves a more general epigenetic  
15 function, modifying bacterial phenotypes in a heritable manner. To address this question,  
16 here we use Oxford Nanopore sequencing to profile DNA modification marks in three natural  
17 isolates of *E. coli*. We first identify the DNA sequence motifs targeted by the  
18 methyltransferases in each strain. We then quantify the frequency of methylation at each of  
19 these motifs across the genome in different growth conditions. We find that motifs in specific  
20 regions of the genome consistently exhibit high or low levels of methylation. Furthermore,  
21 we show that there are replicable and consistent differences in methylated regions across  
22 different growth conditions. This suggests that during growth, *E. coli* transiently differentiates  
23 into distinct methylation states that depend on the growth state, raising the possibility that  
24 measuring DNA methylation alone can be used to infer bacterial growth states without  
25 additional information such as transcriptome or proteome data. These results provide new  
26 insights into the dynamics of methylation during bacterial growth, and provide evidence of  
27 differentiated cell states, a transient analogue to what is observed in the differentiation of  
28 cell types in multicellular organisms.

## 29 Introduction

30 Cellular phenotypes are determined not only by genetic and environmental factors, but also  
31 epigenetic factors (heritable changes to the phenotype which are not caused by changes to  
32 the DNA sequence). In bacteria, epigenetic inheritance of phenotypes is known to occur via  
33 a range of mechanisms, including transgenerational inheritance of transcription factors or  
34 membrane transport proteins (Lambert and Kussell 2014; Kaiser et al. 2018), protein  
35 aggregates (Govers et al. 2018), or by covalent modifications to DNA, such as methylation  
36 (Sánchez-Romero and Casadesús 2020; Hale, van der Woude, and Low 1994). There are  
37 three types of covalent DNA modifications commonly found in bacteria: C<sup>5</sup>-methyl-cytosine  
38 (5mC), C<sup>6</sup>-methyl-adenine (6mA) and N<sup>4</sup>-methyl-cytosine (4mC) (Sánchez-Romero, Cota,  
39 and Casadesús 2015; Blow et al. 2016; Oliveira 2021; John Beaulaurier, Schadt, and Fang  
40 2019). Methylation at these sites occurs via the action of DNA methyltransferases (Heard  
41 and Martienssen 2014; Jablonka and Raz 2009; Casadesús and Low 2006), which are  
42 ubiquitous across bacteria (Oliveira and Fang 2021).

43 Despite the ubiquity of DNA methylation, how often it serves an epigenetic function in  
44 bacteria is not well-established. In many cases, DNA methylation does not lead to different  
45 heritable phenotypes, and thus does not function as an epigenetic mark (Waldminghaus and  
46 Skarstad 2009; Skarstad, Boye, and Steen 1986; Collier 2009). However, a number of  
47 studies have established that DNA methylation can act to regulate cellular processes,  
48 including gene expression (D. Roberts et al. 1985; Seong, Han, and Sul 2021), sometimes  
49 in a heritable manner (Low, Weyand, and Mahan 2001; van der Woude, Hale, and Low  
50 1998; Casadesús and Low 2006; Sánchez-Romero and Casadesús 2020). These  
51 modifications can have significant downstream phenotypic effects (Sánchez-Romero and  
52 Casadesús 2020; Park et al. 2019). Notably, in almost all well-established cases, when DNA  
53 methylation functions in an epigenetic manner, it is highly localised (e.g. at the operon-level)  
54 (Hale, van der Woude, and Low 1994), or even for a single site (Birkholz et al. 2022). One  
55 exception to this is a recent study, which suggested that genome-wide DNA methylation  
56 patterns differ between free-living and terminally differentiated bacteroids of the soil  
57 bacterium *Rhizobium leguminosarum* (Afonin et al. 2021).

58 To further probe possible epigenetic functions of DNA methylation in bacteria, here we  
59 characterise methylation patterns for three natural isolates of *E. coli* across a wide range of  
60 growth conditions. We profile DNA methylation using Oxford Nanopore (ONT) sequencing  
61 (Simpson et al. 2017; Rand et al. 2017), and show that by comparing samples of native

62 methylated genomic DNA to whole genome amplified DNA it is possible to identify the  
63 expected methyltransferase binding motifs. We then use a quantitative approach to show  
64 that across the genome, methylation levels vary in a predictable fashion, and that levels of  
65 methylation differ between growth conditions. These data suggest that *E. coli* cells undergo  
66 environment-dependent transient differentiation into different methylation states during  
67 growth. These changes are not a reflection of cell cycle states, but instead are heritable  
68 changes that are gradually lost after growth ends. These results raise the possibility that in  
69 bacteria, growth states can be inferred solely by quantifying DNA methylation patterns, and  
70 that these patterns correspond to transiently differentiated epigenetic cell states.

## 71 Results

### 72 Determination of Methylation Motifs

73 We first sought to determine which methyltransferases were present in each of three natural  
74 isolates of *E. coli*, denoted here as SC419, SC452, and SC469 (Ishii et al. 2006). We found  
75 the adenine methyltransferase *dam* (which recognizes GATC motifs) and the cytosine  
76 methyltransferase *dcm* (which recognizes CCWGG motifs) in all three strains. We also  
77 found one of the adenine methyltransferases EcoKII or EcoGVI in each of the three strains.  
78 Both of these target the same motif, ATGCAT, and are present in most *E. coli* strains (Fang  
79 et al. 2012; Adzitey et al. 2020). We identified the methyltransferase EcoGIX in strains  
80 SC419 and SC469. EcoGIX is an adenine methyltransferase, with a loosely defined motif  
81 sequence (Fang et al. 2012; Forde et al. 2015). Finally, we identified EcoGVII in strain  
82 SC469, which is a close homologue of DAM (Fang et al. 2012), and recognises the same  
83 target motif.

84 To determine whether each of these methyltransferases was active we used ONT  
85 sequencing to identify genomic sites where DNA was modified. We sequenced native DNA  
86 which may contain modified bases, and whole genome amplified (WGA) DNA which  
87 contains few, if any, modifications. We generated at least 50-fold genomic coverage of ONT  
88 data from native DNA and at least 100-fold genomic coverage of ONT data from WGA DNA.  
89 **(Methods)**. Note that these fold-coverage values are mean coverage values over the whole  
90 genome. To determine which genomic sites were modified we used a simple statistical  
91 approach implemented by Nanodisco (Tourancheau et al. 2021). Nanodisco uses the  
92 differences in the raw nanopore signals from each sample to assign a p-value to every  
93 position in the genome using a Mann-Whitney U-test.

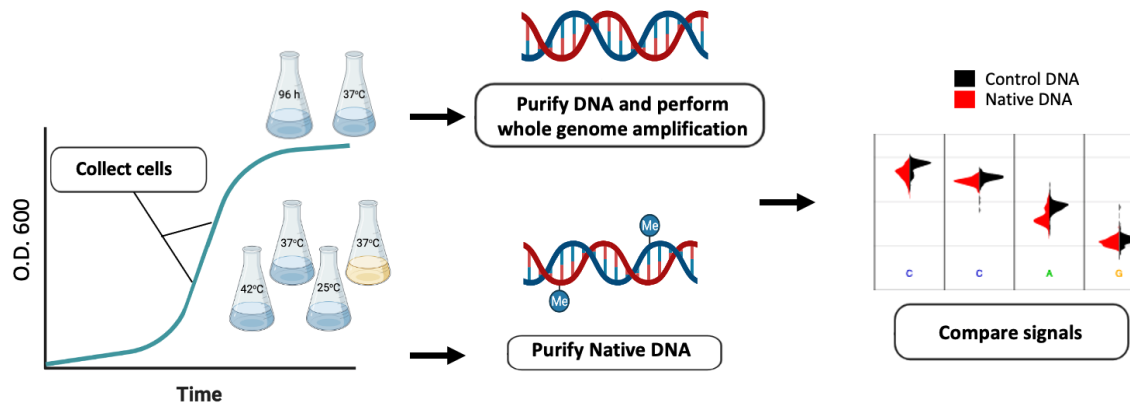

**Fig.1 Experimental design for sampling native (possibly modified) and unmodified DNA.**

To sample native DNA, we grew cultures until exponential phase (for the minimal M9 media, rich LB media, 42°C and 25°C growth conditions); or late stationary phase (for the 96-hour growth condition). For whole genome amplification, we isolated DNA from early stationary phase (24 hours of growth). After purification of genomic DNA (and whole genome amplification when necessary), we sequenced the samples using the ONT platform. To infer DNA modifications, we compared the signals from native and WGA DNA using Nanodisco.

94

95 We selected flanking regions from the 5,000 bases with the lowest p-values for input into  
96 MEME (Bailey et al. 2009) to identify motifs associated with modified bases. However, we  
97 found that in almost all cases, MEME identified only the cytosine methyltransferase DCM  
98 motif (CCWGG). We hypothesised that this was because methylated DCM motifs generally  
99 have smaller p-values than other motifs, due to larger signal deviations from unmethylated  
100 motifs. Because there are more than 13,000 DCM sites in each genome, the vast majority of  
101 the regions with low p-values would have been DCM sites, even when considering a very  
102 large number of sites (e.g., more than 10,000). We found that using a larger number of  
103 regions for input into MEME was computationally prohibitive. We thus randomly subsampled  
104 100,000 base pairs (and associated p-values) from the genome (representing approximately  
105 2% of the genome). From this subsample, we selected the flanking regions for the 5,000  
106 base pairs with the lowest p-values for input into MEME.

107 For all three strains, MEME identified GATC and CCWGG as significant motifs (**Table 1**).  
108 These are the canonical motifs for the DAM and DCM methyltransferases, respectively, and  
109 we had bioinformatically identified both in all three strains. As these match the DAM and  
110 DCM motifs, we assumed that they contain C<sup>6</sup>-methyl-adenine (6mA) at the A position and  
111 C<sup>5</sup>-methyl-cytosine (5mC) at the second cytosine, respectively. Although we computationally  
112 identified the adenine methyltransferases EcoKII and EcoGVI in the three strains, we did not

113 identify their target motif ATGCAT in any strains. We speculate that this is because  
 114 methylated adenines are more difficult to identify (see above), and because this six-base  
 115 pair motif is considerably rarer than the four-base pair motifs recognised by DAM and DCM.  
 116 We also identified methyltransferase activity at two additional motifs, CCGG and GAGCC, in  
 117 SC419 and SC452, respectively. Although there are no experimentally validated  
 118 methyltransferases in the REBASE Gold database that are known to target these motifs,  
 119 there are several putative type III R-M system methyltransferases that are thought to target  
 120 these motifs. We mapped the sequences of each of these putative methyltransferases  
 121 against each genome and identified a single genomic region in SC452 that matched all the  
 122 putative GAGCC modifying methyltransferases (**Table 2**). This methyltransferase has a non-  
 123 palindromic motif, and thus methylates only a single strand (Meisel et al. 1992). Surprisingly,  
 124 we did not identify any CCGG-targeting methyltransferase in the SC419 genome. Finally, for  
 125 the last two computationally identified methyltransferases, EcoGIX and EcoGVII, we could  
 126 not unambiguously confirm any activity. This is not unexpected, as the EcoGIX motif is  
 127 indefinite and the EcoGVII motif overlaps with DAM.

128

129 **Table 1. Matches between sequence motifs identified by MEME and REBASE Gold**  
 130 **methyltransferases.** Each row indicates the top three motifs as reported by MEME.

| Strain | Target motif reported by MEME | Number of motifs identified in 100 Kbp | MEME p-value | Inferred REBASE Gold enzyme |
|--------|-------------------------------|----------------------------------------|--------------|-----------------------------|
| SC419  | CCWGG                         | 632                                    | 3.1e-457     | DCM                         |
|        | GATC                          | 625                                    | 4.9e-177     | DAM                         |
|        | CCGG                          | 376                                    | 2.3e-259     | unknown                     |
| SC452  | CCWGG                         | 750                                    | 2.3e-628     | DCM                         |
|        | GATC                          | 681                                    | 3.3e-235     | DAM                         |
|        | GAGCC                         | 111                                    | 4.1e-24      | M.EcoB0880RFEP <sup>1</sup> |
| SC469  | CCWGG                         | 371                                    | 1.2e-212     | DCM                         |
|        | GATC                          | 185                                    | 1.4e-30      | DAM                         |

131 <sup>1</sup> This is a putative methyltransferase that is not found in the experimentally confirmed REBASE Gold database

132

### 133 Quantitative Analysis of Methylation Levels

134 We next sought to determine whether there was variation in the levels of methylation across  
 135 the genome, or whether all regions were equally methylated. We focused only on the most  
 136 commonly methylated motifs in each genome, GATC (containing methylated adenines via

137 DAM) and CCWGG (containing methylated cytosines via DCM). Critically, the likelihood that  
138 a site is identified as methylated depends on the coverage of that site (**Fig. S1**). Thus, to  
139 increase the likelihood that all sites across the genome had an equal probability of being  
140 identified as methylated, we subsampled each of the ONT sequencing datasets to  
141 standardise coverage across the genome (**Methods**).

142 We then used Nanodisco to compare the native and WGA datasets for all three genomes,  
143 and for each known DAM and DCM motif site identified the lowest p-value from within the  
144 3bp surrounding each motif (see **Methods**, *Quantification of methylation at individual sites*).  
145 These p-values should be indicative of the methylation status of a site, as they result from a  
146 Mann-Whitney U-test comparing the signal levels of modified and unmodified DNA. In  
147 addition, we hypothesised that sites at which all DNA molecules have a methylated  
148 nucleotide would have smaller p-values compared to sites at which only a small number of  
149 molecules are methylated, and that p-values are thus a quantitative indication of methylation  
150 status.

151 To directly test this hypothesis, we subsampled reads from the WGA data (which arises  
152 from fully unmethylated reads) to reach 50x coverage across the genome. We compared  
153 this WGA data with mixed native and WGA datasets having 50x coverage but consisting of  
154 0%, 25%, 50%, 75% or 100% native reads. We expected that many of the native reads were  
155 fully methylated at DCM and DAM motifs. We then used Nanodisco to infer methylation  
156 status for all positions in the genome in these datasets with different ratios of WGA and  
157 native reads. We found a clear negative relationship between the fraction of native reads in  
158 the dataset and the associated p-values for each position (**Fig. 2**): as the fraction of native  
159 (possibly methylated) reads in the dataset increased, the p-values decreased. This indicates  
160 that the p-values returned by Nanodisco are correlated with the fraction of methylated  
161 molecules at a site and may provide quantitative insight into the fraction of molecules that  
162 are methylated at any DAM or DCM position in the genome. However, there are also clear  
163 complicating factors; for example, there is likely to be context-dependence of these p-values  
164 on the local nucleotide sequence.

165 We then implemented a simple binary classification of DAM and DCM sites as being  
166 methylated or unmethylated (or less methylated) using a p-value cut-off (**Fig. S2** and **Fig.**  
167 **S3**). We placed this cut-off such that 10% of non-methylated sites were inferred as being  
168 methylated, analogous to implementing a false discovery rate of 0.1 (**Methods**; **Fig. S4** and  
169 **Fig. S5**). Although it would also be possible to implement a generative model specifying the  
170 fraction of molecules that are methylated at any one location in the genome, without a

171 ground truth set of data for both unmethylated and methylated molecules, this is  
172 complicated. Thus, we use a simplistic binary classification. We note that, this division into  
173 methylated and unmethylated status for each site does not indicate definitively that a site is  
174 methylated or unmethylated. Rather, the division establishes that specific sites are more or  
175 less methylated (**Fig. 2**). We next used this classification of sites as methylated or  
176 unmethylated to test whether there were consistent differences in methylation rates across  
177 the genome or across growth conditions.

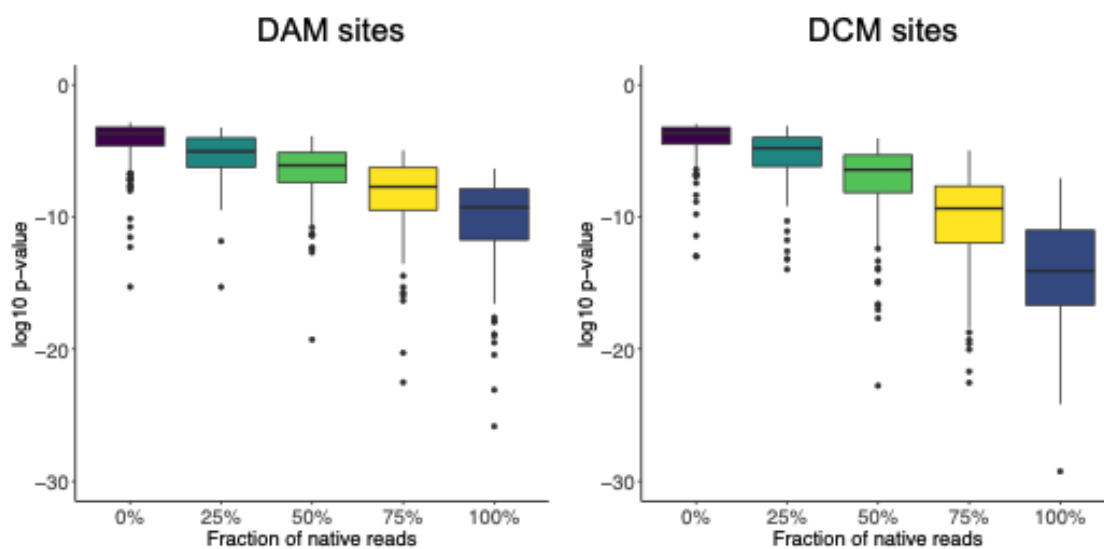

**Figure 2. The p-values resulting from Mann-Whitney U-tests for signal deviations at DAM and DCM sites are correlated with the fraction of methylated molecules.** We mixed known fractions of WGA reads (unmethylated) and native reads (possibly methylated) *in silico* and used Nanodisco to determine the p-value of a Mann Whitney U test at each position in the genome. We then determined the lowest p-value in a three bp window surrounding each hypothetically modified base in DAM (GATC) or DCM (GGCC) motif. For both methyltransferases, the sensitivity of the test increases as the fraction of native reads increases, with the DCM p-values decreasing to a much larger extent.

178

## 179 Identification of Local and Global Methylation Patterns

180 To test for differences in methylation across growth conditions, for each strain we isolated  
181 DNA from cultures grown to exponential phase in five different conditions: two replicate  
182 cultures grown at 37°C in minimal media (M9 glucose), one grown at 37°C in LB broth (rich  
183 media), one grown at 25°C in minimal media (low temperature stress), one grown at 42°C in  
184 minimal media (heat stress), and one after 96 hours of growth in minimal media (late  
185 stationary phase). For each of these growth conditions, we performed the same p-value



186 based analyses outlined above to determine whether DAM and DCM sites were classified  
187 as methylated or unmethylated.

188 We then used this data to look at large scale variation in methylation marks across the  
189 genome, based on both strain and growth environment. Rather than consider single sites,  
190 which exhibit considerable noise in being classified as methylated or unmethylated, we  
191 calculated the fraction of methylated sites in 10 Kbp windows across the genome  
192 (approximately 500 windows in total for a 5 Mbp genome; see **Methods**). Each of these  
193 windows contained approximately 40 DAM or DCM sites. We found that the fraction of sites  
194 classified as methylated within each 10 Kbp window varied by methyltransferase, strain, and  
195 environment (**Fig. 3**).

196 Overall, we inferred that a much higher fraction of DCM sites were methylated compared to  
197 DAM sites (**Fig 3**). Part of this difference is likely due to the fact that the signal differences  
198 between methylated and unmethylated cytosines at DCM sites are much larger than  
199 between methylated and unmethylated adenines at DAM sites (**Fig. 2**). In these cases, it  
200 does not reflect biological differences but differences in the sensitivity of each statistical test.  
201 Nonetheless, we observed that in some growth conditions, a strain exhibited similar levels of  
202 methylation at both DCM and DAM sites (e.g., SC452 at 42°C) whereas another strain in the  
203 same condition could exhibit different levels of methylation (e.g., SC469 at 42°C). This  
204 indicates that it is unlikely that the lower levels of DAM methylation are due solely to  
205 decreased sensitivity, but instead to differences in the activity of each methyltransferase.

206 We also observed general strain-specific differences in methylation, for example, generally  
207 lower levels of both DCM and DAM methylation for SC469. However, it is difficult to  
208 determine whether this reflects real differences in methyltransferase activity between  
209 strains, or whether it is an artefact of the data analysis: for all cases, we inferred methylation  
210 status from a single unmethylated WGA dataset for each strain, and this in itself may cause  
211 differences in inferred methylation levels.

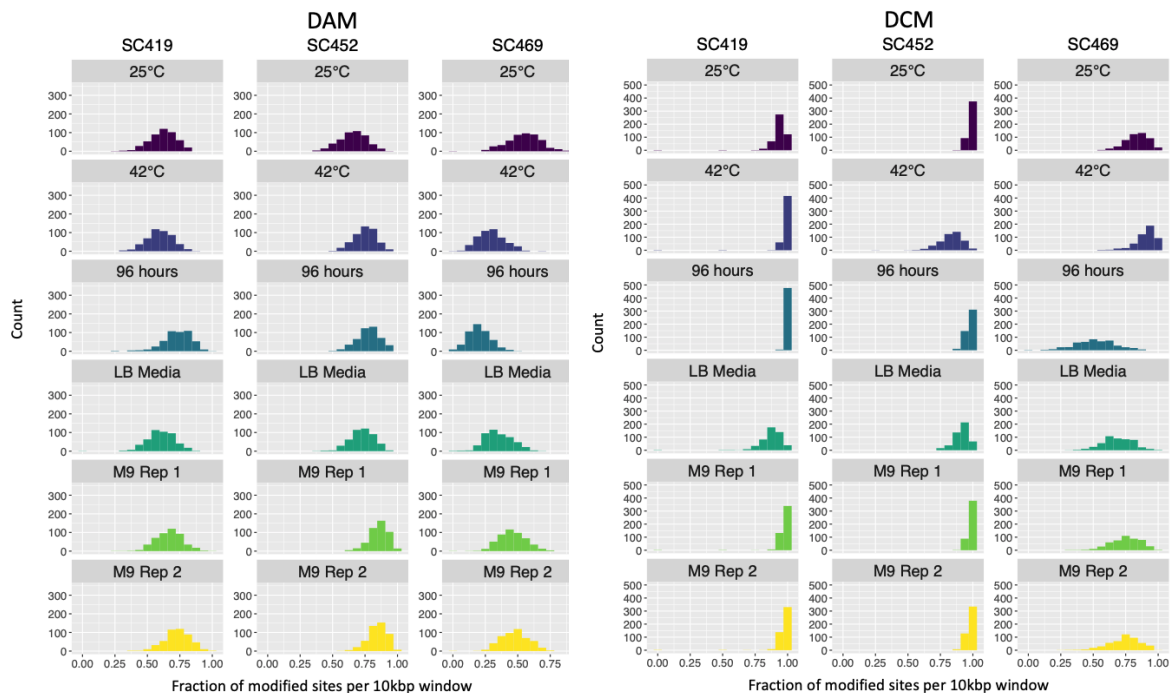

**Figure 3. The fraction of DAM 6mA and DCM 5mC methylated sites within 10 Kbp windows varies according to strain and growth condition.** The histograms in each panel indicate the distribution of 10 Kbp windows in which a certain fraction of sites are DAM (left panel) or DCM (right panel) methylated. This fraction ranges from almost 100% of all sites in all windows (e.g., for SC419 DCM in the 42°C growth condition) to less than 50% of all sites in most windows (e.g., for SC469 DAM in the 42°C growth condition). Except for the LB rich media sample, all cultures were grown in M9 minimal glucose media.

212

213 We next considered whether there were more localised patterns of methylation across the  
214 genome. To do this, we tested for correlations in the fraction of methylated sites within the  
215 10 Kbp windows between growth conditions. Across different sets of growth conditions, we  
216 found that some 10 Kbp windows consistently had the majority of sites methylated, while  
217 other windows had many fewer sites methylated (**Fig. 4A**). It is possible that some of this is  
218 due to differences in coverage, as the relationship between inferred methylation status and  
219 coverage was not totally mitigated by our subsampling scheme (**Methods**). To minimise this  
220 dependence, we calculated the partial correlations in methylated fractions for each 10 Kbp  
221 window accounting for genome coverage (see **Methods**).

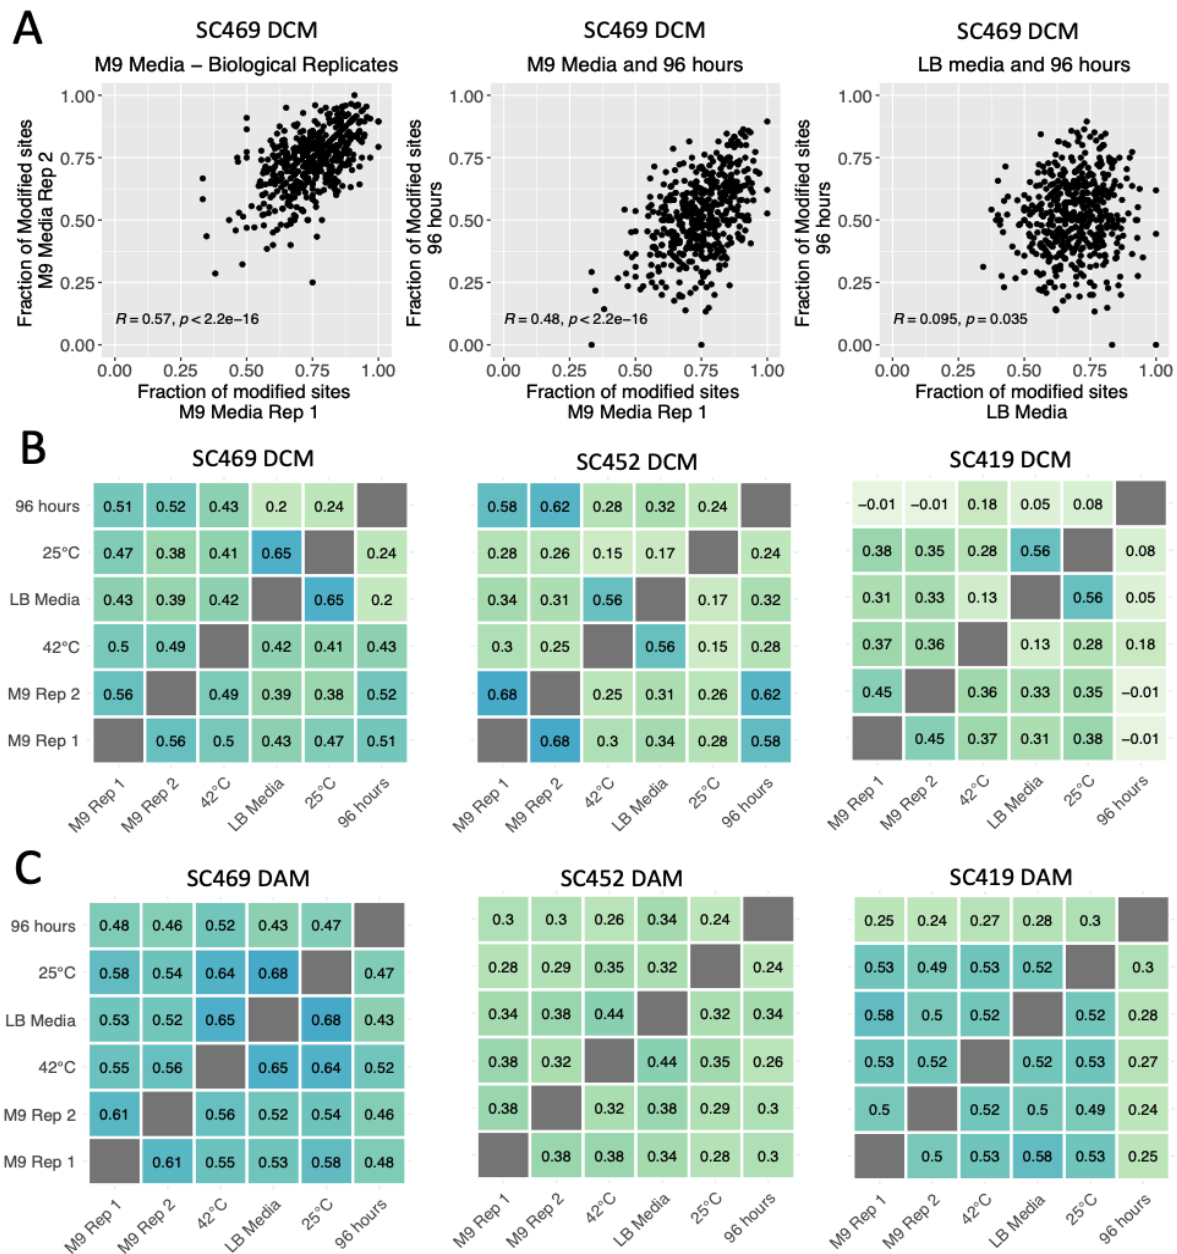

**Figure 4. (A) The fraction of methylated sites in 10Kbp windows across the genome is correlated across growth conditions.** The three panels indicate the fraction of methylated DCM sites within a 10 Kbp window that we inferred as methylated for strain SC469. We observed strong positive correlations in methylation patterns in replicate cultures of minimal M9 glucose media, slightly weaker correlations between M9 media and 96-hour stationary phase cultures, and almost no correlation between patterns in rich LB media and 96 hours stationary phase. Pearson partial correlations and corresponding p-values are indicated in each plot. **(B) Pairwise partial correlations in DAM and (C) DCM methylation patterns between all growth environments accounting for genome coverage.** Each panel shows all pairwise Pearson partial correlations between growth conditions in the fraction of methylated sites for all 10 Kbp windows in the genome, controlling for genome and WGA coverage in each of the growth conditions.

223 We calculated pairwise correlations in the fraction of methylated sites in 10 Kbp windows  
224 across the genome for both DAM and DCM in each strain across all pairs of growth  
225 conditions. We found replicable differences across the genome in methylation fractions (**Fig.**  
226 **4**), with the correlations between some conditions being higher than others. Critically, we  
227 found that in all cases except one, the replicate cultures grown in M9 minimal glucose media  
228 at 37°C exhibited the strongest correlation with the other M9 replicate. For example, for  
229 strain SC469 DCM the partial correlation between M9 replicates 1 and 2 was 0.56. The  
230 second strongest correlations for each were with cultures at 96 hours extended stationary  
231 phase (0.51 and 0.52 for replicates 1 and 2, respectively). Similarly, for SC469 DAM, the  
232 correlation between M9 replicates was 0.61. The second strongest correlations for each  
233 replicate were with growth at 25°C (replicate 1, 0.58) and growth at 42°C (replicate 2, 0.56).

234 This pattern, in which each M9 minimal media replicate correlated most strongly with the  
235 other replicate, extended to almost all strains and methyltransferases, with the single  
236 exception of DAM in strain SC419, for which methylation patterns correlated very similarly  
237 for all pairs of conditions (**Fig. 4C**, rightmost panel). As there are a total of six independent  
238 growth conditions, there is only a one in five chance that the two M9 replicates are most  
239 highly correlated. Thus, the likelihood that they would be the most highly correlated in  
240 almost all strains for both DCM and DAM strongly suggests there are growth-condition  
241 methylation states. Furthermore, these differences exist even when growth conditions differ  
242 only subtly (e.g., growth in minimal M9 glucose media at 37°C versus M9 at 42°C or growth  
243 in minimal media at 37°C versus rich media at 37°C).

244 In addition to high correlations between identical growth conditions, we often found  
245 consistent correlations in methylation status between different growth conditions. For  
246 example, the methylation patterns in the rich media LB condition (grown at 37°C) often  
247 exhibited very strong correlations with methylation patterns in the minimal media 25°C  
248 growth condition. In three cases (SC469 DCM, SC469 DAM, and SC419 DCM), these two  
249 conditions exhibited the strongest correlation of any pair of conditions. The convergent  
250 methylation states in these two conditions may be driven by similar changes in  
251 transcriptional activity, which could have an inhibitory effect on methylation.

252 The lowest levels of correlation we observed were for 96 hours extended stationary phase  
253 for strain SC419 DCM (**Fig. 4B**, rightmost panel). In some cases, the partial correlations  
254 were slightly negative. However, many of the 10 Kbp windows in this condition had almost  
255 100% of all DAM sites methylated (**Fig 3**, right panel). Such low variability in methylation  
256 status means that strong correlations are difficult to obtain.

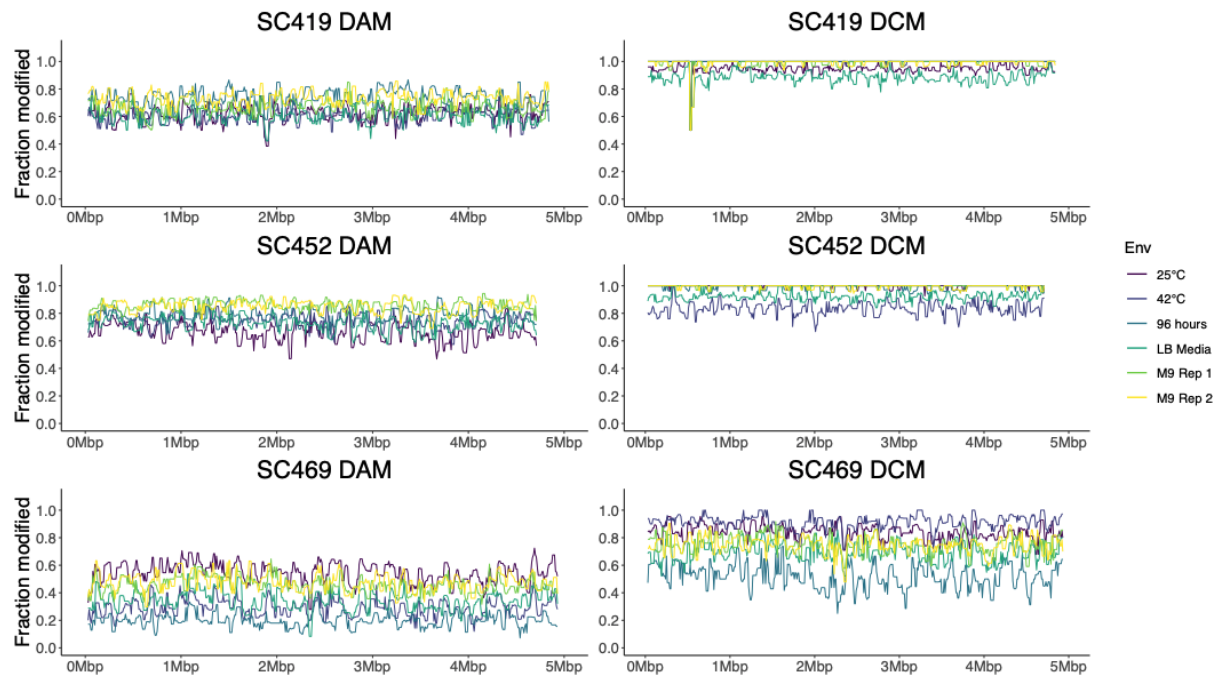

**Figure 5. Genome wide patterns in the fraction of methylated sites.** Each panel shows the fraction of methylated sites in 10 Kbp windows across the entire genome, with different growth conditions indicated in different colours. No long-range correlations, such as higher methylation at the replication terminus, were apparent.

257

258 One explanation for the correlations in methylation fractions across growth conditions is that  
259 there are consistent long-range intragenomic correlations driven by periodicity in  
260 methylation, e.g. methylation fractions are generally lower at the origin of replication and  
261 higher at the terminus, or that there is transient methylation behind the replication fork  
262 (Anton and Roberts 2021). This would be apparent as long-range correlations in the fraction  
263 of methylated sites across the genome. For example, any two windows separated by a  
264 distance that is less than the periodicity should exhibit positive correlations. However,  
265 plotting the fraction of methylated sites across the genome revealed no strong long-range  
266 patterns (**Fig. 5**). To test for long-range patterns more systematically, we calculated  
267 correlations in the fraction of methylated sites within windows of increasing size, from 250  
268 bp to 500 Kbp, separated by distances of increasing size, from 0 bp to 1 Mbp. This is similar  
269 to calculating an autocorrelation function, but for almost all step sizes (**Methods**). Again, we  
270 found no strong patterns of correlation between any windows larger than 5 Kbp, nor  
271 windows separated by more than 5 Kbp (**Fig. S7** and **Fig. S8**). This suggests that short-  
272 range correlations dominate, and there are few long-range correlations in the fraction of

273 methylated sites that are driven by factors such as higher levels of methylation at the  
274 terminus.

## 275 Discussion

276 Here we have identified DNA modifications in three *E. coli* natural isolates across a range of  
277 growth conditions using ONT sequencing. We have shown that it is possible to determine  
278 the motifs at which DNA modifications occur, and that these match the motifs expected  
279 given the restriction modification systems present in each genome. However, we also found  
280 one motif (CCGG) for which we could not identify a matching RM system; this motif may be  
281 modified by a novel methyltransferase.

282 Furthermore, we have shown that by using a simple binary classification of sites as  
283 methylated or unmethylated, it is possible to discern replicable and consistent differences in  
284 localised methylation frequency across the genome. The methylation patterns we have  
285 observed are dependent on growth conditions, with specific localised regions (on the order  
286 of thousands of kilobases) in the genome tending to be fully methylated, while others are  
287 less methylated. These conclusions differ from some previous work. A study on diverse  
288 strains of *M. tuberculosis* showed that most differences in methylation across the genome  
289 (as determined via SMRT sequencing) are due to stochasticity in intracellular methylation,  
290 rather than consistent differences between cells in methylation rates. Consistent differences  
291 between loci in methylation (hypomethylation) were found to be exceedingly rare, on the  
292 order of 10 to 20 sites across the genome (Modlin et al. 2020). Other work has also shown  
293 that methylation remains remarkably consistent across different growth conditions, including  
294 antibiotic stress (Cohen et al. 2016) and over the growth cycle (Payelleville et al. 2018). A  
295 significant difference between these latter two studies and the data we present here is the  
296 inclusion of methylation at DCM sites (CCWGG) in addition to DAM sites (DAM). Indeed, the  
297 most notable methylation patterns that we find – although subtle – are due to differences at  
298 DCM sites (**Fig. 4B**). Differential methylation at DCM sites has been connected to major  
299 changes in ribosomal gene regulation (Militello et al. 2012).

300 Critical to our proposal that these methylation patterns have epigenetic effects is that DNA  
301 methylation is heritable. Sites at which both the top and bottom strand are methylated will  
302 impart hemimethylated strands to both daughter cells, which will become fully methylated by  
303 “maintenance” methyltransferases (Anton and Roberts 2021); sites that are hemimethylated  
304 will impart one hemimethylated strand to one daughter cell and one unmethylated strand,

305 which is more likely to remain unmethylated. This means that mother cells with methylation  
306 at a certain genomic location will have daughter cells that are also methylated at that  
307 location, but this will vary across daughter cells. Thus, if methylation affects phenotype, and  
308 methylation varies between individual cells in a population, then it acts as an epigenetic  
309 mark for the instances we have described here.

310 It is possible that there are unrecognised causes that drive some of the inferred differences  
311 in methylation status across the genome. For example, subtle differences in nucleotide  
312 context affect both the activity of the methyltransferase and the deviations in ONT signal.  
313 This undoubtedly influences our ability to accurately infer methylation status. However, we  
314 do not expect these differences to be dependent on growth conditions. Thus, the fact that  
315 we find both higher correlations between identical growth conditions, and consistently higher  
316 correlations between specific pairs of growth conditions (e.g., rich media (LB) at 37°C and  
317 M9 minimal glucose media at 25°C), suggest that nucleotide context is not the only force  
318 driving this correlation in methylation states. Additional work is required to test the  
319 repeatability of methylation patterns in different conditions, and whether other divergent  
320 growth conditions, for example antibiotic stresses or additional heat stress, lead to greater  
321 differences in methylation patterns. Similarly, methylation patterns should converge as  
322 growth conditions converge - for example we would expect more similar patterns comparing  
323 methylation during growth at 37°C and 39°C than to 42°C. Again, more experimentation is  
324 needed here.

325 In eukaryotes, it is well-established that methylation affects gene expression (Song et al.  
326 2005; Vanderkraats et al. 2013), and thus cell phenotypes. Here we have shown that  
327 methylation patterns are consistent and replicable in different growth conditions in *E. coli*. In  
328 addition, for identical growth conditions (in the data here, M9 minimal glucose media), there  
329 are strong correlations in which specific regions of the genome are methylated. There are  
330 two readily apparent explanations for these results. Either growth phenotypes affect patterns  
331 of methylation, or methylation patterns affect growth phenotypes (or both). We propose that  
332 it is likely that (as with eukaryotic cells) methylation affects gene expression in *E. coli* in  
333 different growth environments, although we have not established causation (Chen et al.  
334 2018). This connection between methylation and transcriptional regulation has been  
335 proposed previously (Beaulaurier et al. 2015), and there are data that both support  
336 (Gaultney et al. 2020) and refute the connection (Mehershahi and Chen 2021). However, we  
337 note that there are many other well-established instances in which this causal direction has  
338 been established (Sánchez-Romero and Casadesús 2020).

339 Regardless of whether methylation functions as an epigenetic mark, and regardless of its  
340 causality, we have shown that just as bacterial cells undergo transient differentiation into  
341 different growth phenotypes, they also undergo transient differentiation into distinct  
342 methylation states. As we have not used synchronised cultures, it is unlikely that the  
343 correlated methylation is due to synchrony in the cell cycle that differs between growth  
344 conditions. This is further supported by the fact that we have shown that correlations do not  
345 arise because of short- or long-range correlation in methylation fractions (e.g., differences in  
346 methylation at the chromosomal replication ori or terminus). Rather, these correlations arise  
347 from localised differences across the chromosome.

348 This work raises the possibility of discerning bacterial growth states without measuring cell  
349 physiology or quantifying the transcriptome, similar to what can be done for differentiated  
350 eukaryotic cells. We propose that with sufficiently long reads and precise measurements, it  
351 will be possible to quantify methylation states across single molecules, and from there infer  
352 the growth state of a cell from which a particular DNA molecule has originated. In addition,  
353 with more nuanced model-based or machine learning analyses, it may be possible to assign  
354 genomic methylation patterns more specifically to specific growth states. This contrasts with  
355 more standard approaches such as single-cell transcriptome profiling, which is often of  
356 limited use in bacteria given the extremely small number of transcripts contained in most  
357 cells.

358



## 359 Methods

### 360 Bacterial Growth

361 We grew overnight cultures from single colonies for each natural isolate in 3mL of liquid LB  
362 media at 37°C. We then inoculated 75mL of the relevant growth media (either LB or M9  
363 minimal media with 0.2% glucose) in a 250ml Erlenmeyer Flask with 75uL of overnight  
364 culture. We grew these at the relevant temperature (37°C, 25°C, 42°C) until an OD600  
365 between 0.4 and 0.5 was reached, or for 24 hours or 96 hours (for WGA and late stationary  
366 phase samples). 5ml of media was removed into a 15ml falcon tube and the cells were  
367 pelleted by centrifugation at 14,000 RPM for four minutes. We removed the media and spun  
368 the cells for an additional two minutes, after which we pipetted off any remaining media. We  
369 stored the cell pellets at -20°C until DNA extraction.

### 370 DNA extraction and whole genome amplification

371 We extracted DNA using the Promega Wizard DNA extraction kit following the gram-  
372 negative bacterial extraction protocol. We performed whole genome amplification (WGA)  
373 using the Qiagen RepliG kit according to the manufacturer's protocol. We used a Qubit  
374 fluorometer to measure DNA concentration, ensuring that each sample had sufficient DNA  
375 for a ligation library prep without further concentrating the sample. We measured DNA purity  
376 with a Nanodrop. For all samples, the 260/230 and 280/230 ratios were between 1.5 and  
377 2.3. We stored DNA at -20°C until library prep and sequencing.

### 378 Library preparation and DNA sequencing

379 We prepared ONT sequencing libraries for both the WGA and native DNA using either the  
380 SQK-LSK109 kit with barcode expansion kit EXP-NBD104 or the SQK-RBK004 kit. For the  
381 SQK-LSK109 kit we followed the manufacturer's protocol with no modifications. We modified  
382 the SQK-RBK004 protocol as follows: we eluted the samples off Agencourt Ampure XP  
383 beads using TE buffer pre-warmed to 50°C; we performed the elution itself at 50°C; and we  
384 increased the incubation time for elution to 10 minutes.

385 We performed ONT sequencing on a MinION Mk1B device using R9.4.1 flowcells. We used  
386 eight flowcells in total (two with SQK-RBK004 libraries and six with SQK-LSK109 libraries),  
387 with 12 samples run per flow cell. One additional flow cell was used to produce an additional

388 1 Gbp for a single sample that had low coverage. For each sequencing run, we  
389 demultiplexed and basecalled using Guppy v4.2.2.

390 For quantitative analysis of methylation, we subsampled all WGA and native sequencing  
391 reads to ensure even coverage across the genome using the following strategy: for each  
392 sample, we mapped all reads onto the relevant reference genome and determined the  
393 lowest 5th percentile of coverage over all samples, excluding the 96-hour sample, which had  
394 lower coverage for all strains (see below). For the 96-hour samples, we calculated the 5th  
395 percentile of coverage only for those samples, rather than across all samples.

396 We then standardised coverage across the chromosomal contig at this 5th percentile level.  
397 We first calculated the mean read length for each dataset. We then divided the genome into  
398 10 Kbp windows and sampled an appropriate number of reads originating within each  
399 window such that the read length and the target coverage matched (e.g., if mean read  
400 length was 2 Kbp and the target coverage was 100X, then we selected 500 reads originating  
401 within the 10 Kbp window). We then mapped all reads back onto the genome to confirm that  
402 we had reached the coverage targets. If the target coverage was not achieved (for example  
403 due to irregularities in the read length distribution), the mean read length was adjusted to  
404 represent the mapped reads and reads were resampled. We then used the ONT-fast5-api to  
405 extract the corresponding fast5 reads for each dataset (see GitHub).

## 406 Identification of methyltransferases

407 We previously produced reference-level genomes for each strain (Breckell and Silander  
408 2020) using Prokka (Seemann 2014). We identified methyltransferases by using bwa mem  
409 (Li 2013) to map all restriction enzymes and methyltransferase enzymes in the REBASE  
410 Gold database (R. J. Roberts et al. 2010) to each strain. The REBASE Gold database  
411 contains only experimentally validated methyltransferase and restriction modification  
412 systems. We filtered the alignments to include only those genes which aligned for more than  
413 97% of their length.

## 414 DNA modification analyses

### 415 Detection of modified sites using Nanodisco

416 We used Nanodisco to detect DNA methylation (Tourancheau et al. 2021) with the  
417 recommended default settings. We processed fast5 reads from both WGA and native DNA

418 samples separately with the Nanodisco pre-process command before running the  
419 Nanodisco difference command to calculate differences in the WGA and native DNA signals  
420 at each position. We used the Nanodisco merge command to create a single output file  
421 containing the native and WGA coverage for each genomic location, the mean signal  
422 difference and U- and t-test p-values reporting the significance of the signal difference at  
423 each site.

#### 424 Quantification of methylation at individual sites

425 The Nanodisco output includes a p-value of a two-tailed Mann-Whitney U-test for each site  
426 indicating whether the signal at that site differs between the modified and unmodified  
427 samples. However, this p-value is not necessarily lowest at the actual point of modification,  
428 as the nanopore detects five bases at once, and the methylation can affect the signal in  
429 unpredictable ways. For example, many bases that were identified as having signals that  
430 differed between native and WGA DNA were not highest at the expected cytosine position  
431 within GATC motifs. To ensure we identified methylated motifs, we first identified all motif  
432 locations (DCM and DAM) in the genome (CCWGG and GATC, respectively), and then  
433 identified the lowest p-value out of the focal base and either neighbouring base. We used  
434 this p-value as an indication of whether a CCWGG or GATC site was methylated.

435 To account for false positive identification of modified sites, we used the p-values from  
436 above for the DCM and DAM sites located in the first 1 Mbp of the genome. We also  
437 identified an equal number of random locations in the first 1 Mbp of the genome, and  
438 identified the lowest p-value of each random bp or either neighbouring bp. We performed  
439 this analysis only in the first 1 Mbp of the genome to minimise computational effort; it is  
440 highly unlikely that this has any effect on the results. This resulted in a set of p-values for  
441 possibly methylated sites within each target motif, and likely unmethylated random sites. We  
442 used the p-values from the random sites to establish a null distribution of p-values for  
443 unmethylated bases. We designated all DAM and DCM sites with p-values lower than the  
444 10th percentile of the null distribution as methylated (**Fig. S1**). All other DAM and DCM sites  
445 we designated as unmethylated. The precise implementation of this method is available  
446 through the GitHub repository indicated above.

#### 447 Correlation in methylation fractions

448 To calculate correlations in the fraction of methylated sites, we first determined the number  
449 of DAM or DCM binding motifs within each 10 Kbp window for each genome. We used this  
450 as an estimate for the number of potential DAM or DCM modifications and then calculated

451 the fraction of DAM or DCM sites which we experimentally identified as modified in each  
452 window. We calculated the correlation between the fraction of modified sites in each window  
453 as a Pearson correlation or a partial correlation accounting for sequencing coverage, as  
454 sequencing coverage affects the likelihood that a site will be detected as modified.

#### 455 Genome wide methylation patterns

456 We assessed genome wide methylation patterns by comparing the fraction of known sites  
457 vs modified sites in windows across 10 Kbp windows in the genome. We discarded any  
458 regions that contained no DAM or DCM sites, as this would result in a division-by-zero  
459 problem. For the normalised data presented in **Fig. S6**, we simply divided the fraction of  
460 methylated sites in each window by the mean of all windows across the genome.

## 461 References

- 462 Adzitey, Frederick, Jonathan Asante, Hezekiel M. Kumalo, Rene B. Khan, Anou M.  
463 Somboro, and Daniel G. Amoako. 2020. "Genomic Investigation into the Virulome,  
464 Pathogenicity, Stress Response Factors, Clonal Lineages, and Phylogenetic  
465 Relationship of Escherichia Coli Strains Isolated from Meat Sources in Ghana." *Genes*  
466 11 (12). <https://doi.org/10.3390/genes11121504>.
- 467 Afonin, A. M., E. S. Gribchenko, E. A. Zorin, A. S. Sulima, and V. A. Zhukov. 2021. "DNA  
468 Methylation Patterns Differ between Free-Living Rhizobium Leguminosarum RCAM1026  
469 and Bacteroids Formed in Symbiosis with Pea (Pisum Sativum L.)."  
470 <https://europepmc.org/article/ppr/ppr412911>.
- 471 Anton, Brian P., and Richard J. Roberts. 2021. "Beyond Restriction Modification: Epigenomic  
472 Roles of DNA Methylation in Prokaryotes." *Annual Review of Microbiology* 75 (October):  
473 129–49.
- 474 Bailey, Timothy L., Mikael Boden, Fabian A. Buske, Martin Frith, Charles E. Grant, Luca  
475 Clementi, Jingyuan Ren, Wilfred W. Li, and William S. Noble. 2009. "MEME SUITE:  
476 Tools for Motif Discovery and Searching." *Nucleic Acids Research* 37 (Web Server  
477 issue): W202–8.
- 478 Beaulaurier, John, Eric E. Schadt, and Gang Fang. 2019. "Deciphering Bacterial  
479 Epigenomes Using Modern Sequencing Technologies." *Nature Reviews. Genetics* 20  
480 (3): 157–72.
- 481 Beaulaurier, J., Xue-Song Zhang, Shijia Zhu, R. Sebra, C. Rosenbluh, G. Deikus, Nan Shen,  
482 et al. 2015. "Single Molecule-Level Detection and Long Read-Based Phasing of  
483 Epigenetic Variations in Bacterial Methylomes." *Nature Communications* 6.  
484 <https://doi.org/10.1038/ncomms8438>.
- 485 Birkholz, Nils, Simon A. Jackson, Robert D. Fagerlund, and Peter C. Fineran. 2022. "A  
486 Mobile Restriction–modification System Provides Phage Defence and Resolves an  
487 Epigenetic Conflict with an Antagonistic Endonuclease." *Nucleic Acids Research*.  
488 <https://doi.org/10.1093/nar/gkac147>.
- 489 Blow, Matthew J., Tyson A. Clark, Chris G. Daum, Adam M. Deutschbauer, Alexey  
490 Fomenkov, Roxanne Fries, Jeff Froula, et al. 2016. "The Epigenomic Landscape of  
491 Prokaryotes." Edited by Gang Fang. *PLoS Genetics* 12 (2): e1005854.
- 492 Breckell, Georgia, and Olin K. Silander. 2020. "Complete Genome Sequences of 47  
493 Environmental Isolates of Escherichia Coli." *Microbiology Resource Announcements* 9  
494 (38). <https://doi.org/10.1128/MRA.00222-20>.

- 495 Casadesús, Josep, and David Low. 2006. "Epigenetic Gene Regulation in the Bacterial  
496 World." *Microbiology and Molecular Biology Reviews: MMBR* 70 (3): 830–56.
- 497 Chen, Liang, Haicheng Li, Tao Chen, Li Yu, Huixin Guo, Yuhui Chen, Mu Chen, et al. 2018.  
498 "Genome-Wide DNA Methylation and Transcriptome Changes in Mycobacterium  
499 Tuberculosis with Rifampicin and Isoniazid Resistance." *International Journal of Clinical  
500 and Experimental Pathology* 11 (6): 3036–45.
- 501 Cohen, Nadia R., Christian A. Ross, Saloni R. Jain, R. Shapiro, A. Gutierrez, Peter Belenky,  
502 Hu Li, and J. J. Collins. 2016. "A Role for the Bacterial GATC Methylome in Antibiotic  
503 Stress Survival." *Nature Genetics* 48: 581–86.
- 504 Collier, Justine. 2009. "Epigenetic Regulation of the Bacterial Cell Cycle." *Current Opinion in  
505 Microbiology* 12 (6): 722–29.
- 506 Fang, Gang, Diana Munera, David I. Friedman, Anjali Mandlik, Michael C. Chao, Onureena  
507 Banerjee, Zhixing Feng, et al. 2012. "Genome-Wide Mapping of Methylated Adenine  
508 Residues in Pathogenic Escherichia Coli Using Single-Molecule Real-Time  
509 Sequencing." *Nature Biotechnology* 30 (12): 1232–39.
- 510 Forde, Brian M., Minh-Duy Phan, Jayde A. Gawthorne, Melinda M. Ashcroft, Mitchell  
511 Stanton-Cook, Sohinee Sarkar, Kate M. Peters, et al. 2015. "Lineage-Specific  
512 Methyltransferases Define the Methylome of the Globally Disseminated Escherichia Coli  
513 ST131 Clone." *mBio* 6 (6): e01602–15.
- 514 Gaultney, Robert A., Antony T. Vincent, Céline Lorient, Jean-Yves Coppée, Odile Sismeiro,  
515 Hugo Varet, Rachel Legendre, Charlotte A. Cockram, Frédéric J. Veyrier, and Mathieu  
516 Picardeau. 2020. "4-Methylcytosine DNA Modification Is Critical for Global Epigenetic  
517 Regulation and Virulence in the Human Pathogen *Leptospira Interrogans*." *Nucleic  
518 Acids Research* 48 (21): 12102–15.
- 519 Govers, Sander K., Julien Mortier, Antoine Adam, and Abram Aertsen. 2018. "Protein  
520 Aggregates Encode Epigenetic Memory of Stressful Encounters in Individual  
521 Escherichia Coli Cells." *PLoS Biology* 16 (8): e2003853.
- 522 Hale, W. B., M. W. van der Woude, and D. A. Low. 1994. "Analysis of Nonmethylated GATC  
523 Sites in the Escherichia Coli Chromosome and Identification of Sites That Are  
524 Differentially Methylated in Response to Environmental Stimuli." *Journal of Bacteriology*  
525 176 (11): 3438–41.
- 526 Heard, Edith, and Robert A. Martienssen. 2014. "Transgenerational Epigenetic Inheritance:  
527 Myths and Mechanisms." *Cell* 157 (1): 95–109.
- 528 Ishii, Satoshi, Winfried B. Ksoll, Randall E. Hicks, and Michael J. Sadowsky. 2006.  
529 "Presence and Growth of Naturalized Escherichia Coli in Temperate Soils from Lake

- 530 Superior Watersheds.” *Applied and Environmental Microbiology* 72 (1): 612–21.
- 531 Jablonka, Eva, and Gal Raz. 2009. “Transgenerational Epigenetic Inheritance: Prevalence,  
532 Mechanisms, and Implications for the Study of Heredity and Evolution.” *The Quarterly*  
533 *Review of Biology* 84 (2): 131–76.
- 534 Kaiser, Matthias, Florian Jug, Thomas Julou, Siddharth Deshpande, Thomas Pfohl, Olin K.  
535 Silander, Gene Myers, and Erik van Nimwegen. 2018. “Monitoring Single-Cell Gene  
536 Regulation under Dynamically Controllable Conditions with Integrated Microfluidics and  
537 Software.” *Nature Communications* 9 (1): 212.
- 538 Lambert, Guillaume, and Edo Kussell. 2014. “Memory and Fitness Optimization of Bacteria  
539 under Fluctuating Environments.” *PLoS Genetics* 10 (9): e1004556.
- 540 Li, Heng. 2013. “Aligning Sequence Reads, Clone Sequences and Assembly Contigs with  
541 BWA-MEM,” March. <http://arxiv.org/abs/1303.3997>.
- 542 Low, D. A., N. J. Weyand, and M. J. Mahan. 2001. “Roles of DNA Adenine Methylation in  
543 Regulating Bacterial Gene Expression and Virulence.” *Infection and Immunity* 69 (12):  
544 7197–7204.
- 545 Mehershahi, Kurosh S., and S. Chen. 2021. “Methylation by Multiple Type I Restriction  
546 Modification Systems Avoids Influencing Gene Regulation in Uropathogenic *Escherichia*  
547 *Coli*.” *bioRxiv*. <https://doi.org/10.1101/2021.01.08.425850>.
- 548 Meisel, A., T. A. Bickle, D. H. Krüger, and C. Schroeder. 1992. “Type III Restriction Enzymes  
549 Need Two Inversely Oriented Recognition Sites for DNA Cleavage.” *Nature* 355 (6359):  
550 467–69.
- 551 Militello, Kevin T., Robert D. Simon, Mehr Qureshi, Robert Maines, Michelle L. VanHorne,  
552 Stacy M. Hennick, Sangeeta K. Jayakar, and Sarah Pounder. 2012. “Conservation of  
553 Dcm-Mediated Cytosine DNA Methylation in *Escherichia Coli*.” *FEMS Microbiology*  
554 *Letters* 328 (1): 78–85.
- 555 Modlin, Samuel J., Derek Conkle-Gutierrez, Calvin Kim, Scott N. Mitchell, Christopher  
556 Morrissey, Brian C. Weinrick, William R. Jacobs, Sarah M. Ramirez-Busby, Sven E.  
557 Hoffner, and Faramarz Valafar. 2020. “Drivers and Sites of Diversity in the DNA  
558 Adenine Methylomes of 93 *Mycobacterium Tuberculosis* Complex Clinical Isolates.”  
559 *eLife* 9 (October). <https://doi.org/10.7554/eLife.58542>.
- 560 Oliveira, Pedro H. 2021. “Bacterial Epigenomics: Coming of Age.” *mSystems* 6 (4):  
561 e0074721.
- 562 Oliveira, Pedro H., and Gang Fang. 2021. “Conserved DNA Methyltransferases: A Window  
563 into Fundamental Mechanisms of Epigenetic Regulation in Bacteria.” *Trends in*  
564 *Microbiology* 29 (1): 28–40.

- 565 Park, Hye-Jee, Boknam Jung, Jungkwan Lee, and Sang-Wook Han. 2019. “Functional  
566 Characterization of a Putative DNA Methyltransferase, EadM, in *Xanthomonas*  
567 *Axonopodis* Pv. Glycines by Proteomic and Phenotypic Analyses.” *Scientific Reports* 9  
568 (1): 2446.
- 569 Payelleville, Amaury, Ludovic Legrand, J. Ogier, Céline Roques, A. Roulet, O. Bouchez,  
570 Annabelle Mouammine, A. Givaudan, and Julien Brillard. 2018. “The Complete  
571 Methylome of an Entomopathogenic Bacterium Reveals the Existence of Loci with  
572 Unmethylated Adenines.” *Scientific Reports* 8. [https://doi.org/10.1038/s41598-018-](https://doi.org/10.1038/s41598-018-30620-5)  
573 30620-5.
- 574 Rand, Arthur C., Miten Jain, Jordan M. Eizenga, Audrey Musselman-Brown, Hugh E. Olsen,  
575 Mark Akeson, and Benedict Paten. 2017. “Mapping DNA Methylation with High-  
576 Throughput Nanopore Sequencing.” *Nature Methods* 14 (4): 411–13.
- 577 Roberts, D., B. C. Hoopes, W. R. McClure, and N. Kleckner. 1985. “IS10 Transposition Is  
578 Regulated by DNA Adenine Methylation.” *Cell* 43 (1): 117–30.
- 579 Roberts, Richard J., Tamas Vincze, Janos Posfai, and Dana Macelis. 2010. “REBASE—a  
580 Database for DNA Restriction and Modification: Enzymes, Genes and Genomes.”  
581 *Nucleic Acids Research* 38 (suppl\_1): D234–36.
- 582 Sánchez-Romero, María A., and Josep Casadesús. 2020. “The Bacterial Epigenome.”  
583 *Nature Reviews. Microbiology* 18 (1): 7–20.
- 584 Sánchez-Romero, María A., Ignacio Cota, and Josep Casadesús. 2015. “DNA Methylation in  
585 Bacteria: From the Methyl Group to the Methylome.” *Current Opinion in Microbiology* 25  
586 (June): 9–16.
- 587 Seemann, Torsten. 2014. “Prokka: Rapid Prokaryotic Genome Annotation.” *Bioinformatics*  
588 30 (14): 2068–69.
- 589 Seong, Hoon Je, Sang-Wook Han, and Woo Jun Sul. 2021. “Prokaryotic DNA Methylation  
590 and Its Functional Roles.” *Journal of Microbiology* 59 (3): 242–48.
- 591 Simpson, Jared T., Rachael E. Workman, P. C. Zuzarte, Matei David, L. J. Dursi, and  
592 Winston Timp. 2017. “Detecting DNA Cytosine Methylation Using Nanopore  
593 Sequencing.” *Nature Methods* 14 (4): 407–10.
- 594 Skarstad, K., E. Boye, and H. B. Steen. 1986. “Timing of Initiation of Chromosome  
595 Replication in Individual *Escherichia Coli* Cells.” *The EMBO Journal* 5 (7): 1711–17.
- 596 Song, Fei, Joseph F. Smith, Makoto T. Kimura, Arlene D. Morrow, Tomoki Matsuyama,  
597 Hiroki Nagase, and William A. Held. 2005. “Association of Tissue-Specific Differentially  
598 Methylated Regions (TDMs) with Differential Gene Expression.” *Proceedings of the*  
599 *National Academy of Sciences of the United States of America* 102 (9): 3336–41.



- 600 Tourancheau, Alan, Edward A. Mead, Xue-Song Zhang, and Gang Fang. 2021. "Discovering  
601 Multiple Types of DNA Methylation from Bacteria and Microbiome Using Nanopore  
602 Sequencing." *Nature Methods* 18 (5): 491–98.
- 603 Vanderkraats, Nathan D., Jeffrey F. Hiken, Keith F. Decker, and John R. Edwards. 2013.  
604 "Discovering High-Resolution Patterns of Differential DNA Methylation That Correlate  
605 with Gene Expression Changes." *Nucleic Acids Research* 41 (14): 6816–27.
- 606 Waldminghaus, Torsten, and Kirsten Skarstad. 2009. "The Escherichia Coli SeqA Protein."  
607 *Plasmid* 61 (3): 141–50.
- 608 Woude, M. van der, W. B. Hale, and D. A. Low. 1998. "Formation of DNA Methylation  
609 Patterns: Nonmethylated GATC Sequences in Gut and Pap Operons." *Journal of*  
610 *Bacteriology* 180 (22): 5913–20.

611

## 612 Author statements

### 613 Authors and Contributors

614 Conceptualisation: GLB and OKS. Methodology: GLB and OKS. Investigation: GLB. Writing  
615 – Original Draft Preparation: GLB and OKS. Writing – Review and Editing: GLB and OKS.  
616 Visualisation: GLB (lead) and OKS (supporting). Supervision: OKS. Funding: OKS.

### 617 Conflicts of interest

618 The authors declare that there are no conflicts of interest.

### 619 Funding information

620 This work was supported by a Marsden Grant from the Royal Society of New Zealand (grant  
621 MAU1703) awarded to OKS. The funder had no role in study design, data collection and  
622 interpretation, or the decision to submit the work for publication.

### 623 Acknowledgments

624 Thank you to N. Freed for assistance with whole genome amplification and Oxford  
625 Nanopore sequencing, B. Morampalli for fruitful discussions on inferring methylation, A. Sulit  
626 and M. Vkllová for help with R and Python debugging, and A. Tourancheau for advice on  
627 using Nanodisco.

## 628 Supplementary Figures

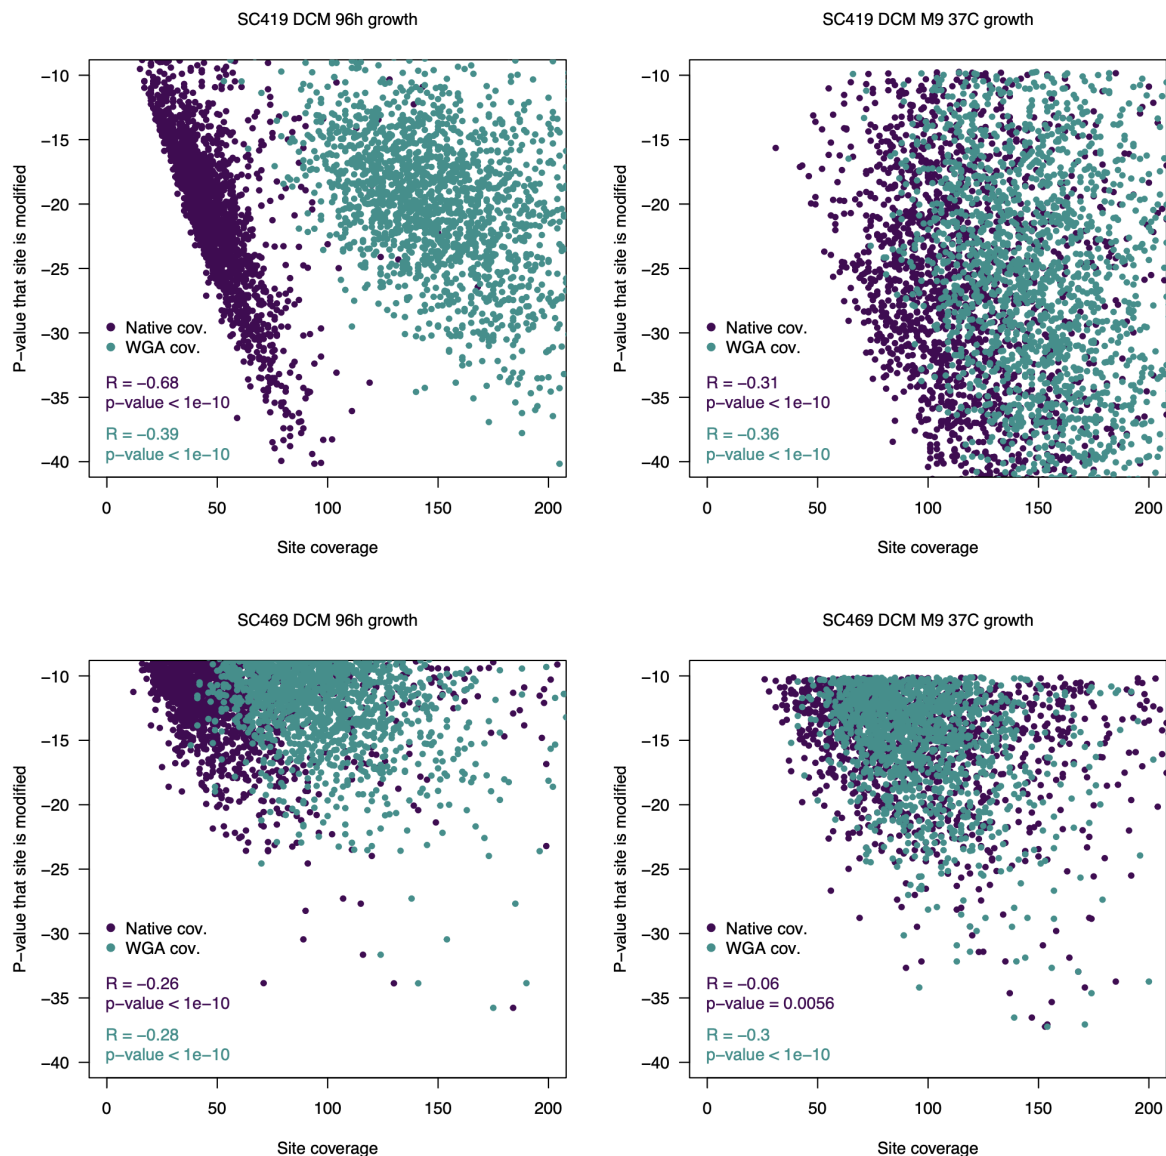

**Supplementary Figure S1. Correlation between coverage and the Nanodisco-derived p-values.** Each point indicates the coverage at individual DAM or DCM sites and the p-value of the Nanodisco Mann-Whitney U-test. There is a clear relationship between the likelihood the p-value returned by Nanodisco (indicating a site is likely modified) and the coverage at that site, with both the coverage of the native DNA sample and the WGA sample affecting the test implemented by Nanodisco. The four examples above are all for DCM sites in two strains and two growth conditions for each. In all plots, only the sites that have p-values significantly lower than the null model background are shown. The native coverage at these sites is shown in purple; the WGA coverage at these same sites is in blue. For both native and WGA coverage, there is a strong negative correlation - sites with higher coverage have a lower p-value and a higher probability of being identified as methylated, although this differs between datasets. For example, there is only a weak relationship ( $R = -0.06$ ) between native coverage and the p-value to the test in the SC469 DCM dataset.

## Forward strand

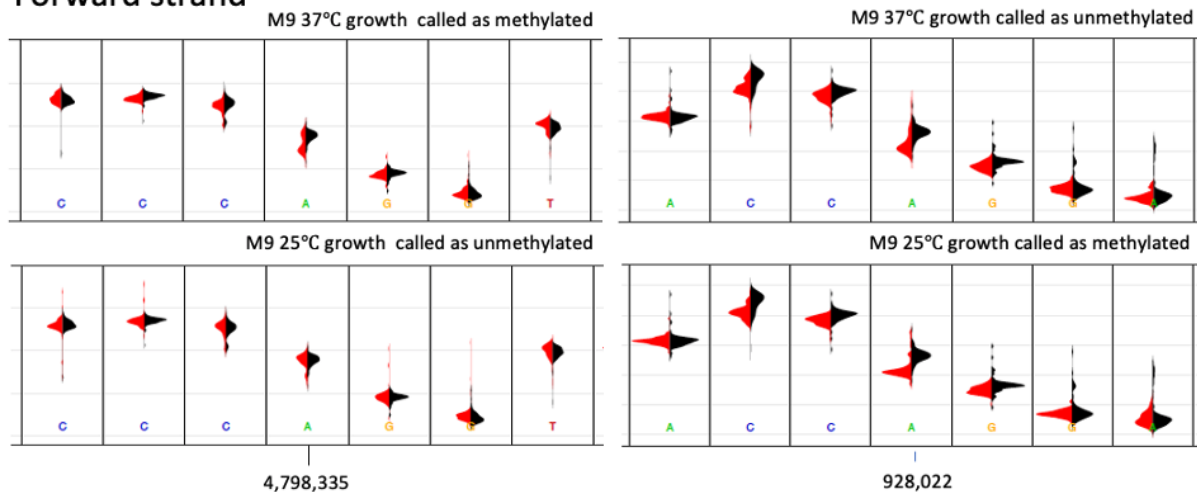

## Reverse strand

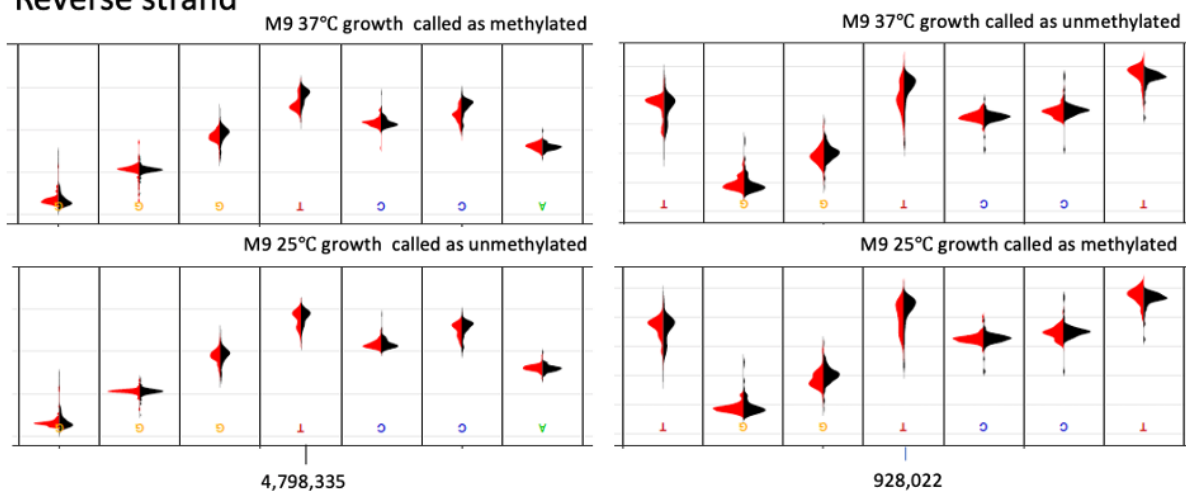

**Supplementary Figure S2. Raw nanopore signal distributions on the forward and reverse strands at identical genomic locations of DCM sites that we inferred as methylated (top panels in each pair) or unmethylated (bottom panels in each pair).** The change in the DCM CCwGG methylation status is apparent as a shift in the distribution of the red curves at the A / T position outlined with the blue box. In black are reads from the control (unmethylated whole genome amplified DNA); in red are the native DNA signals. In many cases, the shift in signal is subtle. However, the identification of these sites as methylated or unmethylated is a binary classification of a continuous state - sites that we identify as unmethylated may in fact be methylated in 40% of all cells; sites we identify as methylated may be methylated in only 60% of all cells.

630

631

632

### Forward strand

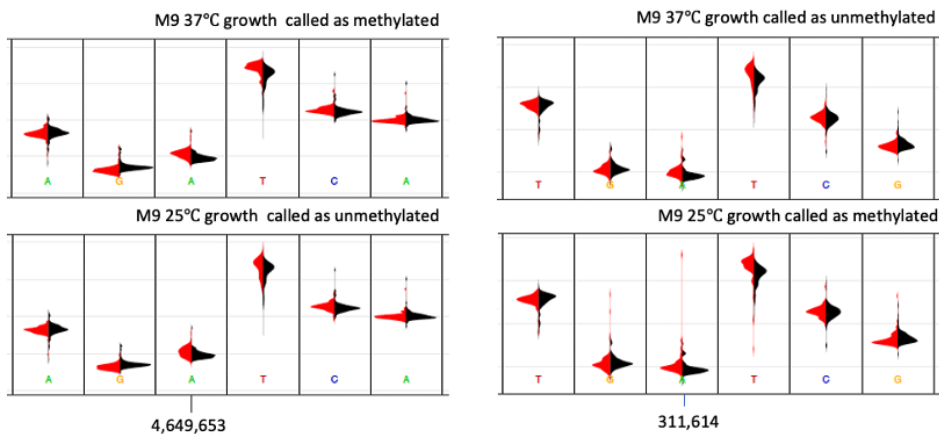

### Reverse strand

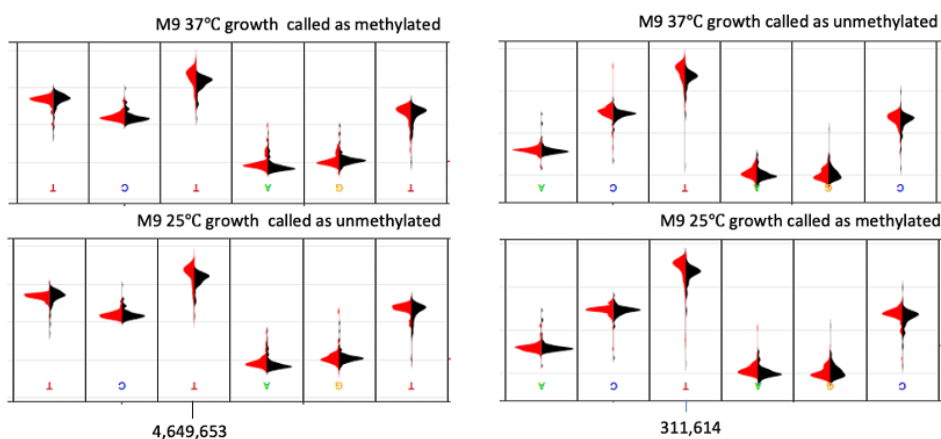

**Supplementary Figure S3. Identical DAM sites are inferred as methylated or unmethylated across different growth conditions.** The change in the DAM GATC methylation status is apparent as a shift in the distribution of the raw nanopore signal from native DNA (red curves) at the T and A positions (the A is the modified base) compared to WGA unmodified DNA (black curves). Left panels: a DAM 6mA site that we inferred as methylated in M9 37°C growth (top) but not during 25°C growth (bottom). This is most apparent as a shift in the signal at the T position, for which the overlap between red and black is less in the top panel. Right panels: a DAM GATC site that we inferred as unmethylated in M9 37°C growth (top) but methylated during 25°C growth. Again, this is most apparent as a shift in the signal at the T position, with the overlap being higher in the top panel. Note that all native DNA molecules are not necessarily methylated at positions that we call as methylated, and vice versa: at positions that we call as unmethylated, all molecules are not necessarily unmethylated.

633

634

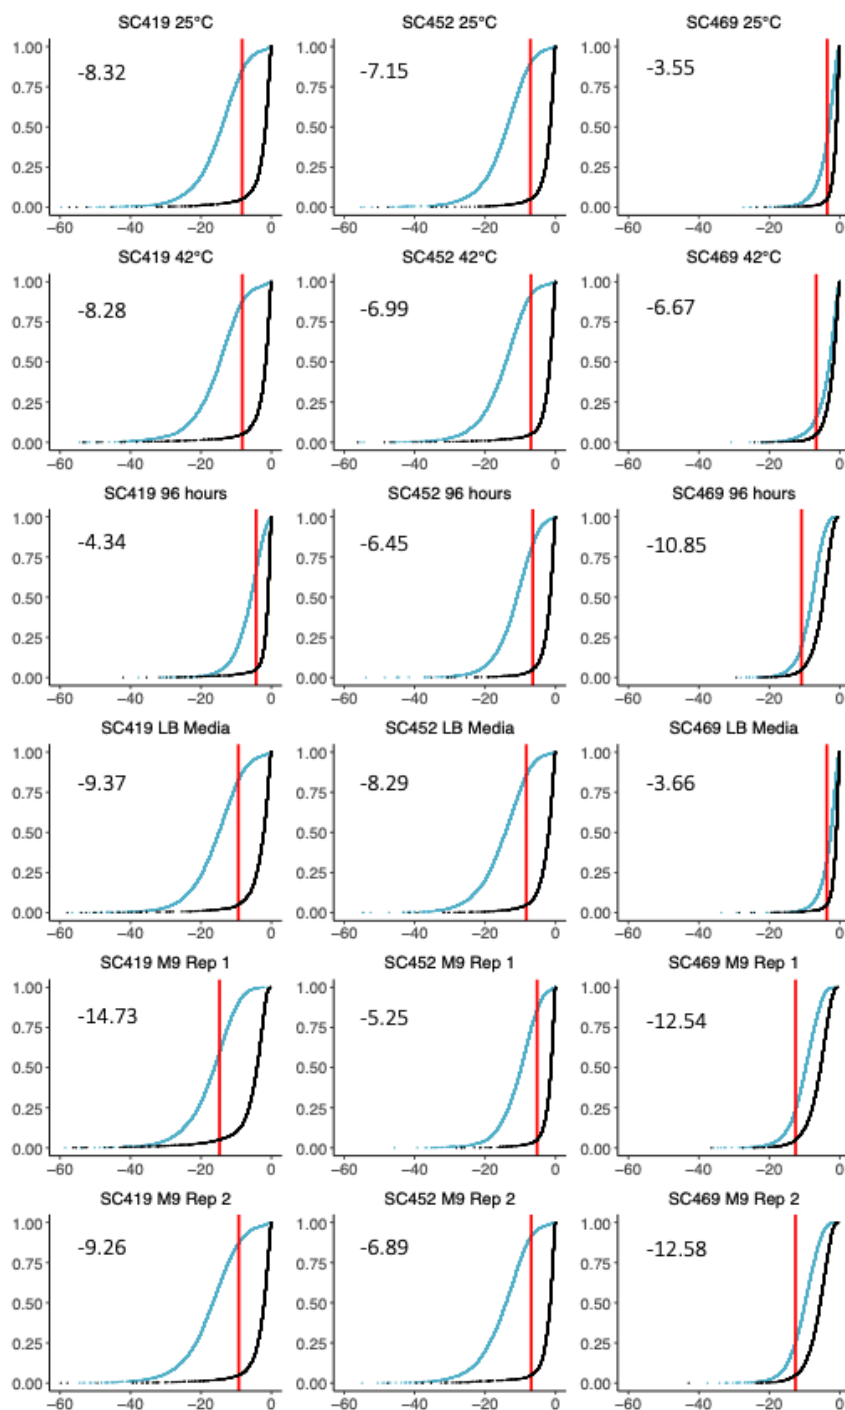

**Supplementary Figure S4. Cumulative distributions of p-values for DAM sites relative to random (unmethylated) sites.** For each combination of isolate and growth condition we used the distribution of p-values at DAM binding sites (blue) and an equal number of random sites (black) to determine a p-value cut-off. This cut-off was established such that 10% of all unmodified sites were inferred as being modified, equivalent to a 0.1 FDR. Each cut-off is shown in red, and the log<sub>10</sub> of the p-value cut-off is noted within each plot.

635

30

636

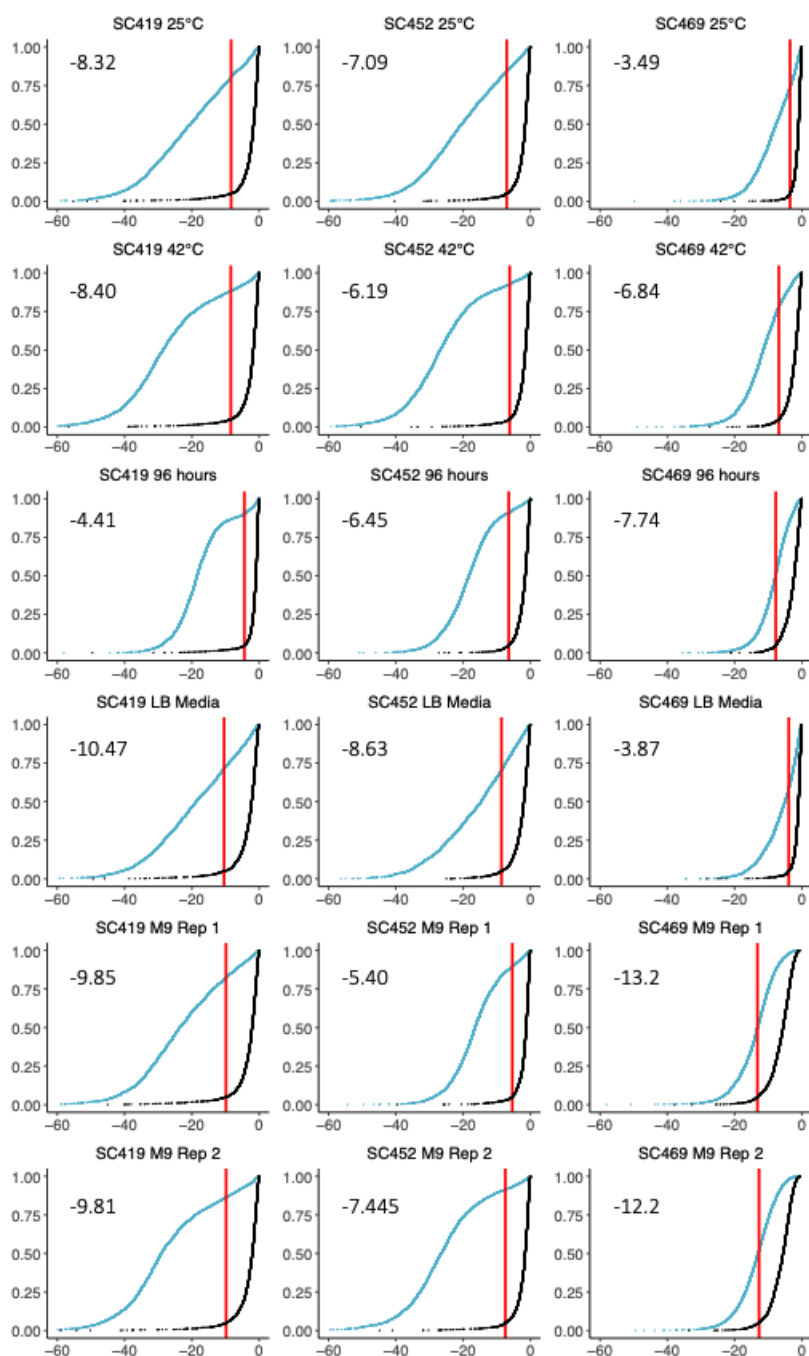

**Supplementary Figure S5. Cumulative distribution of p-values for DCM sites relative to random sites.** For each combination of isolate and growth condition we used the cumulative distribution of p-values at DCM binding sites (blue) and an equal number of random sites (black) to determine a p-value cut-off equivalent to an FDR of 0.1. Each cut-off is shown in red, and the log<sub>10</sub> of the p-value cut-off is noted within each plot.

637

638

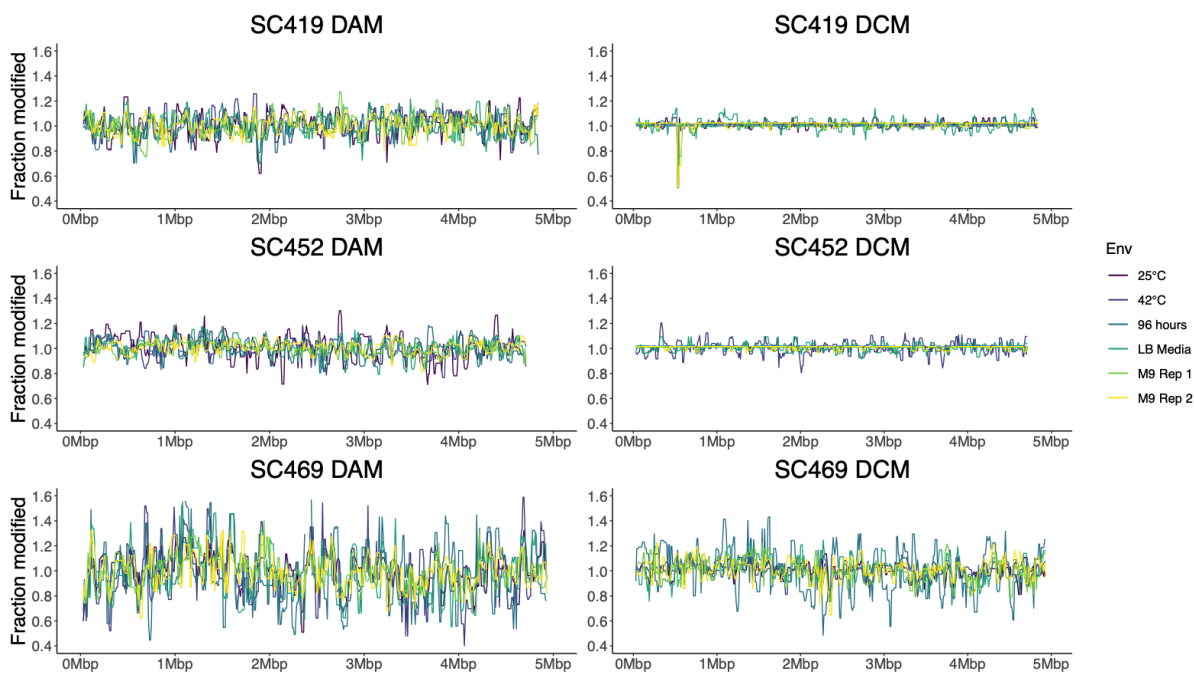

**Supplementary Figure S6. Mean-normalised fractions of modified sites across the genome.**

For each growth condition, we divided the fraction of modified sites in each window by the mean fraction of modified sites across all windows for that growth condition. This normalised fraction of modified sites are generally consistent across the genome for each methyltransferase and strain, which is clearly apparent in **Fig. 4**.

639



640

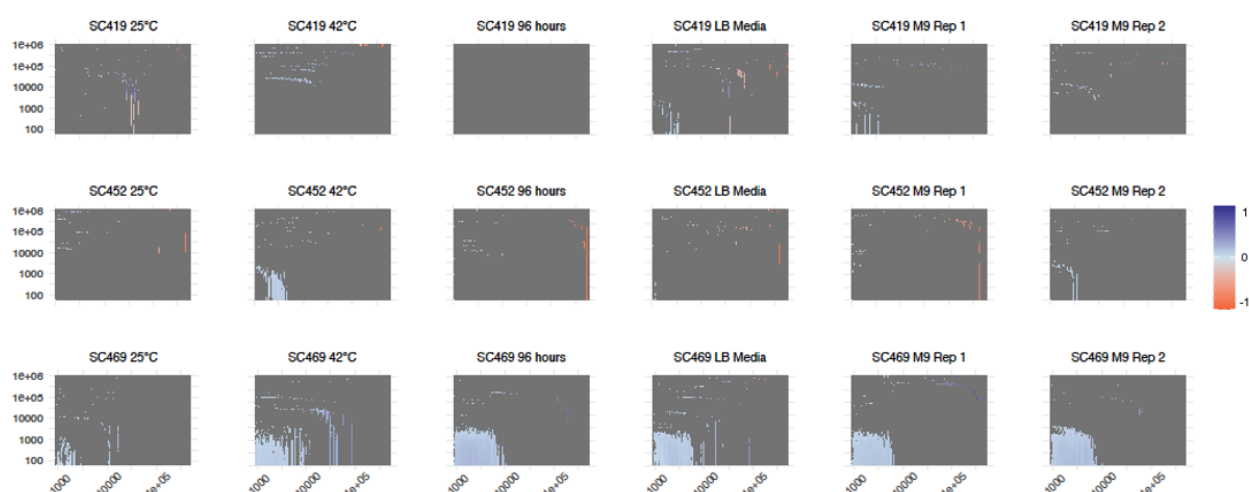

**Supplementary Figure S7. Global autocorrelation plots for DCM methylation.** Each panel is a heatmap showing the correlation for the fraction of methylated DCM sites between windows of increasing size, ranging from 250 bp to 500 Kbp (different window sizes are plotted in columns), separated by increasing distances ranging from 0 (i.e., adjacent windows) to 1 Mbp (different distances are plotted in rows). Window sizes increase by a constant fraction of 4.7%; separating distances increase by a constant fraction of 9.6%. For example, the bottom left square in each heatmap shows the correlation in the fraction of methylated sites for neighbouring 250 bp windows; the middle square in each plot shows the correlation between 20.9 Kbp windows separated by 7.6 Kbp; the top right indicates 500 Kbp windows separated by 1 Mbp. In the example here, a standard autocorrelation function (ACF) would plot the correlations between windows of a certain size separated by a specific number of windows (e.g., 10 Kbp windows separated by 0 bp (neighbouring), 10 Kbp (one window), 20 Kbp (two windows), etc. This would be similar to several squares in the 53rd column in this plot: the squares in rows 1 (0 bp distance between windows), 56 (10 Kbp distance), 64 (20 Kbp distance), 68 (30.2 Kbp distance), 71, 74, and 76. However, this plot shows the analogous set of correlations at almost all window sizes and distances. For clarity only correlations with  $p < 0.01$  are shown. In almost all cases, the correlations are positive (i.e., windows that are close tend to have similar levels of methylation), but this correlation only exists for windows up to approximately 5-8 Kbp in size and separated by a maximum of 5 Kbp. This suggests that there are no long-range correlations in the fraction of methylated sites. Note that the strongest correlations are observed for strain SC469, which is also the strain that exhibited the greatest variance in fraction methylated across genomic windows (**Fig. 3**). For other strains, the low level of variance in methylated fractions necessarily weakens the correlations.

641

642

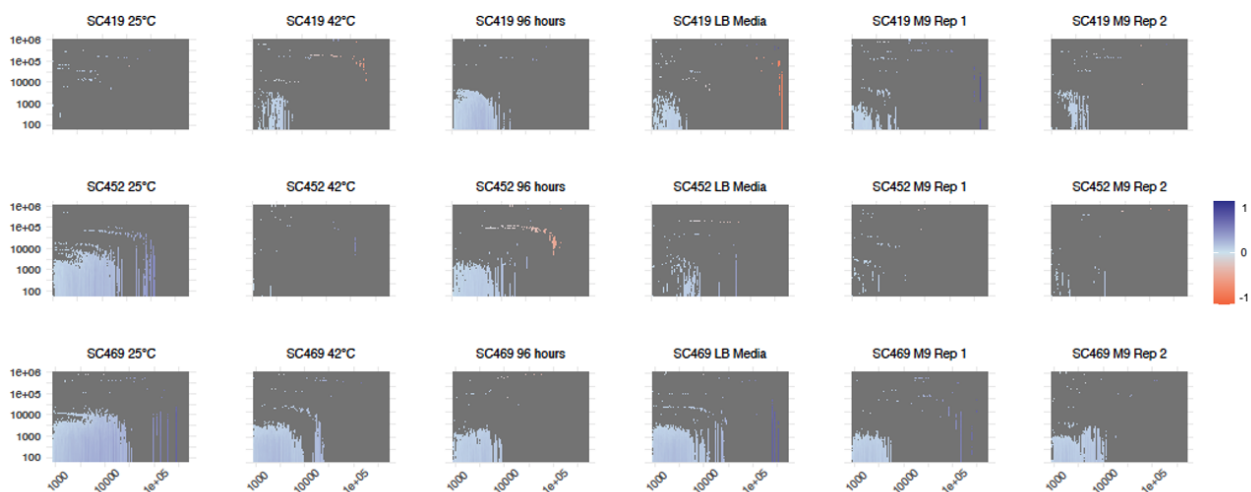

**Supplementary Figure S8. Global autocorrelation plots for DAM methylation.** The annotation and details of this plot are the same as those shown in **Supp. Fig. S7** but for DAM methylation. Again, for clarity only correlations in  $p < 0.01$  are shown. The correlations here in the fraction of methylated sites in a window are in general stronger but extend to a similar distance to those observed for DCM. Again, the strongest correlations are observed for strain SC469. However, correlations are also apparent for other strains in other conditions, also most likely because DAM methylated fractions exhibited much greater variation than DCM (**Fig. 3**).

643

644
